# Supplementary material for: Machine-learning-accelerated simulations to enable automatic surface reconstruction
Source: Springer Nature journal article supplement (doi:10.1038/s43588-023-00571-7), 2023-12-07
Supplement: 43588_2023_571_MOESM1_ESM.pdf [file 43588_2023_571_MOESM1_ESM.pdf]

# Machine-learning-accelerated simulations to enable automatic surface reconstruction

---

In the format provided by the authors and unedited

## Supplementary Section 1: Abbreviations used

The following is the list of abbreviations utilized.

- DFT: Density-functional theory
- MC: Monte Carlo
- MCMC: Markov-chain Monte Carlo
- ML: Machine learning
- NFF: Neural network force field
- AL: Active learning
- AutoSurfRecon: Automatic Surface Reconstruction
- VSSR-MC: Virtual Surface Site Relaxation-Monte Carlo
- DAS: Dimer-atom stacking fault
- SD: Standard deviation
- MAE: Mean absolute error
- PCA: Principal component analysis
- DL: Double layer
- SL: Single layer
- LR: Learning rate
- SRS: Stephenson, Radny & Smith (potential)

## Supplementary Section 2: Surface stability analysis

The stability of surfaces can be compared using the surface Gibbs free energy  $\Omega_{\text{surf}}$  [1-3]:

$$\Omega_{\text{surf}} = G_{\text{slab}} - \sum_{\text{all } a} N_a \mu_a \quad (\text{S1})$$

where  $G_{\text{slab}}$  refers to the Gibbs free energy of the slab. For each element  $a$ ,  $N_a$  refers to the number of  $a$  atoms in the slab,  $\mu_a$  refers to the chemical potential of  $a$ .

For  $\text{SrTiO}_3$  specifically, we have its surface Gibbs free energy:

$$\Omega_{\text{surf}}^{\text{SrTiO}_3} = G_{\text{slab}} - N_{\text{Sr}} \mu_{\text{Sr}} - N_{\text{Ti}} \mu_{\text{Ti}} - N_{\text{O}} \mu_{\text{O}} \quad (\text{S2})$$

The  $\text{SrTiO}_3$  chemical potential is defined as the sum of the chemical potentials of the component elements:

$$\mu_{\text{SrTiO}_3} = \mu_{\text{Sr}} + \mu_{\text{Ti}} + 3\mu_{\text{O}}$$

At thermodynamic equilibrium, the chemical potential of the surface is equal to the bulk crystal Gibbs free energy:

$$\mu_{\text{SrTiO}_3} = g_{\text{SrTiO}_3}^{\text{bulk}}$$

Substituting, we obtain:

$$\Omega_{\text{surf}}^{\text{SrTiO}_3} = G_{\text{slab}} - N_{\text{Ti}} g_{\text{SrTiO}_3}^{\text{bulk}} - \Gamma_{\text{Sr}}^{\text{Ti}} \mu_{\text{Sr}} - \Gamma_{\text{O}}^{\text{Ti}} \mu_{\text{O}} \quad (\text{S3})$$

where  $\Gamma_a^{\text{Ti}} = N_a - N_{\text{Ti}} \frac{N_a^{\text{bulk}}}{N_{\text{Ti}}^{\text{bulk}}}$  refers to the excess  $a$  component in the surface with respect to the number of Ti atoms and  $\frac{N_a^{\text{bulk}}}{N_{\text{Ti}}^{\text{bulk}}}$  refers to the bulk stoichiometric ratio of  $a$  to Ti.

The bulk Gibbs free energy for a crystal can be decomposed into the following:

$$g_a^{\text{bulk}} = E_a^{\text{bulk}} + E_a^{\text{vib}} - T s_a + p v_a \quad (\text{S4})$$

where  $E_a^{\text{bulk}}$  is the static crystal energy obtained through DFT calculations,  $E_a^{\text{vib}}$  is the vibrational component,  $T$  is the temperature,  $s_a$  is the entropy of the crystal,  $p$  is the pressure, and  $v_a$  is the volume of the crystal. By performing approximations similar to [1, 2], changes in  $E_a^{\text{vib}}$  due to temperature roughly cancel out changes in  $T s_a$  while  $p v_a$  is negligible.

Thus, Gibbs free energies can be approximated by the DFT energies:

$$g_a^{\text{bulk}} \approx E_a^{\text{bulk}}$$

For later convenience in plotting the phase diagram, bulk-subtracted chemical potentials are introduced for Sr and Ti:

$$\mu'_{\text{Sr}} = \mu_{\text{Sr}} - g_{\text{Sr}}^{\text{bulk}} \approx \mu_{\text{Sr}} - E_{\text{Sr}}^{\text{bulk}} \quad (\text{S5})$$

$$\mu'_{\text{Ti}} = \mu_{\text{Ti}} - g_{\text{Ti}}^{\text{bulk}} \approx \mu_{\text{Ti}} - E_{\text{Ti}}^{\text{bulk}} \quad (\text{S6})$$

where  $E_{\text{Sr}}^{\text{bulk}}$  and  $E_{\text{Ti}}^{\text{bulk}}$  are obtained from DFT calculations.

Similarly,  $\mu'_O$  is defined with the reference state as an isolated oxygen molecule:

$$\mu'_O = \mu_O - \frac{1}{2}E_{\text{O}_2} \quad (\text{S7})$$

where  $E_{\text{O}_2}$  is the DFT total energy of a single oxygen molecule.

Additionally,  $\mu_O$  can be defined as a function of experimental conditions,  $\text{O}_2$  partial pressure ( $p_{\text{O}_2}$ ) and temperature ( $T$ ), with the following equation:

$$\mu_O(T, p_{\text{O}_2}) = \frac{1}{2} \left[ E_{\text{O}_2} + \mu_{\text{O}_2}(T, p_0) + k_B T \ln \left( \frac{p_{\text{O}_2}}{p_0} \right) \right] \quad (\text{S8})$$

where  $p_0 = 1$  bar is the reference pressure and  $\mu_{\text{O}_2}(T, p_0)$  is the reference chemical potential obtained from NIST [4].

We swap out  $\mu_a$  for  $\mu'_a$  and transform to obtain:

$$\Omega_{\text{surf}}^{\text{SrTiO}_3} = \phi - \Gamma_{\text{Sr}}^{\text{Ti}} \mu'_{\text{Sr}} - \Gamma_{\text{O}}^{\text{Ti}} \mu'_O \quad (\text{S9})$$

where

$$\begin{aligned} \phi &= G_{\text{slab}} - N_{\text{Ti}} g_{\text{SrTiO}_3}^{\text{bulk}} - \Gamma_{\text{Sr}}^{\text{Ti}} g_{\text{Sr}}^{\text{bulk}} - \Gamma_{\text{O}}^{\text{Ti}} \frac{E_{\text{O}_2}}{2} \\ &\approx E_{\text{slab}} - N_{\text{Ti}} E_{\text{SrTiO}_3}^{\text{bulk}} - \Gamma_{\text{Sr}}^{\text{Ti}} E_{\text{Sr}}^{\text{bulk}} - \Gamma_{\text{O}}^{\text{Ti}} \frac{E_{\text{O}_2}}{2} \end{aligned}$$

$G_{\text{slab}}$  is approximated by the slab energy  $E_{\text{slab}}$ . For thermodynamic stability,  $\mu'_{\text{Sr}} < 0$ ,  $\mu'_O < 0$ .

Note: In our main text, we denote  $\mu'_{\text{Sr}}$  and  $\mu'_O$  as  $\mu_{\text{Sr}}$  and  $\mu_O$  respectively for simplicity.

VSSR-MC samples according to the grand potential  $\Omega_G$ , which is equivalent to  $\Omega_{\text{surf}}$  after approximations:

$$\begin{aligned} \Omega_G^{\text{SrTiO}_3} &= E_{\text{slab}} - T s_{\text{slab}} - N_{\text{Sr}} \mu_{\text{Sr}} - N_{\text{Ti}} \mu_{\text{Ti}} - N_{\text{O}} \mu_{\text{O}} \quad (\text{S10}) \\ &= G_{\text{slab}} - p v_{\text{slab}} - N_{\text{Sr}} \mu_{\text{Sr}} - N_{\text{Ti}} \mu_{\text{Ti}} - N_{\text{O}} \mu_{\text{O}} \\ &\approx G_{\text{slab}} - N_{\text{Sr}} \mu_{\text{Sr}} - N_{\text{Ti}} \mu_{\text{Ti}} - N_{\text{O}} \mu_{\text{O}} \\ &= \Omega_{\text{surf}}^{\text{SrTiO}_3} \end{aligned}$$

## References

- [S1] Reuter, K. & Scheffler, M. Composition, structure, and stability of  $\text{RuO}_2(110)$  as a function of oxygen pressure. *Physical Review B* **65** (3), 035406 (2001). <https://doi.org/10.1103/PhysRevB.65.035406>.
- [S2] Heifets, E., Ho, J. & Merinov, B. Density functional simulation of the  $\text{BaZrO}_3(011)$  surface structure. *Physical Review B* **75** (15), 155431 (2007). <https://doi.org/10.1103/PhysRevB.75.155431>.
- [S3] Heifets, E., Piskunov, S., Kotomin, E. A., Zhukovskii, Y. F. & Ellis, D. E. Electronic structure and thermodynamic stability of double-layered  $\text{SrTiO}_3(001)$  surfaces: *Ab initio* simulations. *Physical Review B* **75** (11), 115417 (2007). <https://doi.org/10.1103/PhysRevB.75.115417>.
- [S4] Allison, T. C. NIST-JANAF Thermochemical Tables - SRD 13 (2013). URL <https://janaf.nist.gov/>.
